# 1 A Systematic Review of Machine Learning-based Prognostic Models for Acute 2 Pancreatitis: Towards Improving Methods and Reporting Quality

3  
4 **Brian Critelli<sup>¶</sup>, Amier Hassan<sup>¶</sup>**, Ila Lahooti<sup>2</sup>, Lydia Noh<sup>3</sup>, Jun Sung Park<sup>2</sup>, Kathleen Tong<sup>2</sup>, Ali  
5 Lahooti<sup>1</sup>, Nate Matzko<sup>1</sup>, Jan Niklas Adams<sup>4</sup>, Lukas Liss<sup>4</sup>, Justin Quion<sup>5</sup>, David Restrepo<sup>5</sup>, Melica  
6 Nikahd<sup>6</sup>, Stacey Culp<sup>6</sup>, Adam Lacy-Hulbert<sup>7</sup>, Cate Speake<sup>8</sup>, James Buxbaum<sup>9</sup>, Jason Bischof<sup>10</sup>, Cemal  
7 Yazici<sup>11</sup>, Anna Evans Phillips<sup>12</sup>, Sophie Terp<sup>13</sup>, Alexandra Weissman<sup>14</sup>, Darwin Conwell<sup>15</sup>, Phil Hart<sup>2</sup>,  
8 Mitch Ramsey<sup>2</sup>, Somashekar Krishna<sup>2</sup>, Samuel Han<sup>2</sup>, Erica Park<sup>2</sup>, Raj Shah<sup>2</sup>, Venkata Akshintala<sup>16</sup>, John  
9 A Windsor<sup>17</sup>, Nikhil K Mull<sup>18</sup>, Georgios I Papachristou<sup>2</sup>, Leo Anthony Celi<sup>5, 19</sup>, Peter J Lee<sup>2\*</sup>

10 **Short title:** A Systematic Review of Machine Learning Prognostic Models for Acute Pancreatitis

11 Author affiliations:

- 12 1. Weill Cornell Medical College, Division of Gastroenterology and Hepatology
- 13 2. Ohio State University Wexner Medical Center, Division of Gastroenterology and Hepatology
- 14 3. Northeast Ohio Medical School
- 15 4. Rheinisch-Westfälische Technische Hochschule Aachen University, Division of Process and Data Science
- 16 5. Massachusetts Institute of Technology, Laboratory for Computational Physiology
- 17 6. Ohio State University Wexner Medical Center, Division of Bioinformatics
- 18 7. Center for Systems Immunology, Benaroya Research Institute at Virginia Mason, Seattle, Washington.
- 19 8. Center for Interventional Immunology, Benaroya Research Institute at Virginia Mason, Seattle,  
20 Washington.
- 21 9. University of Southern California, Division of Gastroenterology
- 22 10. Ohio State University Wexner Medical Center, Division of Emergency Medicine
- 23 11. University of Illinois at Chicago, Division of Gastroenterology
- 24 12. University of Pittsburgh Medical Center, Division of Gastroenterology
- 25 13. University of Southern California, Division of Emergency Medicine
- 26 14. University of Pittsburgh Medical Center, Division of Emergency Medicine
- 27 15. University of Kentucky, Department of Medicine
- 28 16. Johns Hopkins Medical Center, Division of Gastroenterology
- 29 17. University of Auckland, Surgical and Translational Research Centre
- 30 18. University of Pennsylvania, Division of Hospital Medicine and Penn Medicine Center for Evidence-based  
31 Practice
- 32 19. Beth Israel Medical Center, Division of Critical Care

33  
34 <sup>¶</sup>: Amier Hassan and Brian Critelli are co-first authors (i.e., these authors contributed equally to this work)

35 \*Corresponding author: Peter J Lee

36 Email: [Peter.Lee@osumc.edu](mailto:Peter.Lee@osumc.edu)

37

38 Conflicts of interest: all authors declare no conflicts of interest

39 **Title:** A Systematic Review of Machine Learning-based Prognostic Models for Acute Pancreatitis:  
40 Towards Improving Methods and Reporting Quality

41  
42 **Background:** An accurate prognostic tool is essential to aid clinical decision making (e.g., patient triage)  
43 and to advance personalized medicine. However, such prognostic tool is lacking for acute pancreatitis (AP).  
44 Increasingly machine learning (ML) techniques are being used to develop high-performing prognostic  
45 models in AP. However, **methodologic and reporting quality has received little attention**. High-quality  
46 reporting and study methodology are critical to model validity, reproducibility, and clinical implementation.  
47 In collaboration with content experts in ML methodology, we performed a systematic review critically  
48 appraising the quality of methodology and reporting of recently published ML AP prognostic models.

49  
50 **Methods:** Using a validated search strategy, we identified ML AP studies from the databases MEDLINE,  
51 PubMed, and EMBASE published between January 2021 and December 2023. Eligibility criteria included  
52 all retrospective or prospective studies that developed or validated new or existing ML models in patients  
53 with AP that predicted an outcome following an episode of AP. Meta-analysis was considered if there was  
54 homogeneity in the study design and in the type of outcome predicted. For risk of bias (ROB) assessment,  
55 we used the Prediction Model Risk of Bias Assessment Tool (PROBAST). Quality of reporting was  
56 assessed using the Transparent Reporting of a Multivariable Prediction Model of Individual Prognosis or  
57 Diagnosis – Artificial Intelligence (TRIPOD+AI) statement that defines standards for 27 items that should  
58 be reported in publications using ML prognostic models.

59  
60 **Results:** The search strategy identified 6480 publications of which 30 met the eligibility criteria. Studies  
61 originated from China (22), U.S (4), and other (4). All 30 studies developed a new ML model and none  
62 sought to validate an existing ML model, producing a total of 39 new ML models. AP severity (23/39) or  
63 mortality (6/39) were the most common outcomes predicted. The mean area-under-the-curve for all models  
64 and endpoints was 0.91 (SD 0.08). The ROB was high for at least one domain in all 39 models, particularly  
65 for the analysis domain (37/39 models). Steps were not taken to minimize over-optimistic model  
66 performance in 27/39 models. Due to heterogeneity in the study design and in how the outcomes were  
67 defined and determined, meta-analysis was not performed.  
68 Studies reported on only 15/27 items from TRIPOD+AI standards, with only 7/30 justifying sample size  
69 and 13/30 assessing data quality. Other reporting deficiencies included omissions regarding human-AI  
70 interaction (28/30), handling low-quality or incomplete data in practice (27/30), sharing analytical codes  
71 (25/30), study protocols (25/30) and reporting source data (19/30),.

72  
73 **Discussion:** There are significant deficiencies in the methodology and reporting of recently published ML  
74 based prognostic models in AP patients. These undermine the validity, reproducibility and implementation  
75 of these prognostic models despite their promise of superior predictive accuracy.

76  
77 **Funding:** none

78 **Registration:** Research Registry ([reviewregistry1727](https://www.crd.york.ac.uk/PROSPERO/record/2024062600001727))

79

## 80 **INTRODUCTION**

81 Defined as acute inflammation of the pancreas, acute pancreatitis (AP) remains a common and  
82 costly cause of gastrointestinal-related hospitalization, with 1 million new cases each year globally  
83 and increasing incidence[1, 2]. The etiology of the disease varies across patient demographics,  
84 with gallstones and alcohol comprising the majority of adult cases and diverse environmental  
85 factors such as hypertriglyceridemia, drugs, infections, or trauma[3]. The severity of AP can be  
86 further categorized as mild, moderately severe, or severe, with severe AP being defined by the  
87 presence of persistent organ failure [4]. The combination of persistent organ failure and infected  
88 pancreatic necrosis defines a ‘critical’ category of AP severity with the highest morbidity and  
89 mortality risk[5, 6]. Survivors of AP can suffer from long-term sequelae including diabetes  
90 mellitus, recurrent or chronic pancreatitis, and pancreatic exocrine insufficiency[3, 7-10]. Given  
91 the significant short- and long-term morbidity and mortality associated with AP, the National  
92 Institute of Health has called for an accurate prognostic model in AP for use in research and the  
93 clinical setting[11-13]. Benefits of an accurate prognostic model are many, including enablement  
94 of cost-efficient clinical trials through cohort enrichment [14, 15], identification of subphenotypes  
95 within a cohort that require different treatment strategies [16, 17], and prompt triaging of patients  
96 in the emergency room [18].

97 Current prognostic models for AP were developed using regression-based techniques (e.g.,  
98 Glasgow Criteria, Bedside Index for Severity in Acute Pancreatitis (BISAP) etc.) which  
99 demonstrate suboptimal performance and limited clinical usefulness[19]. For example, in a  
100 prospective external evaluation of regression-based models predicting mortality, none of the  
101 models tested produced a post-test probability higher than 14% when “positive”[20]. There has  
102 been a call for new approaches to improve prediction accuracy [19, 21]. Advances in the subset

103 of artificial intelligence (AI) known as machine learning (ML) have facilitated the development of  
104 non-regression prediction models, which offer advantages over regression-based models by  
105 performing better in diseases with non-linear predictor-outcome relationships such as AP[22].  
106 There has been an increasing number of published ML-based prognostic models that appear to  
107 outperform regression-based models [23-25]. However, ML experts have cited concerns regarding  
108 methodologic quality, model building practices, and lack of transparent reporting [26-28]. We  
109 therefore undertook a systematic review and critical appraisal of recent published studies  
110 proposing new non-regression ML based prognostic models to detail any methodological  
111 shortcomings and/or gaps in reporting. This was a collaborative effort between experienced  
112 clinicians and ML experts [19].

113

## 114 **METHODS**

115 Detailed methodology of this review has been published elsewhere[29] (doi: 10.1186/s41512-024-  
116 00169-1). We conducted a systematic review of all studies published between January 2021 and  
117 December 2023 in which a non-regression, ML-based prognostic model in AP was developed  
118 and/or validated (either internally or externally), with or without model updating. This review  
119 included studies of prospective or retrospective design including post-hoc analysis of clinical trials  
120 that: a) enrolled only adult patients (i.e., 18 years old or older), b) contained a prognostic model of  
121 AP developed with non-regression ML technique(s), c) predicted any outcome(s) of AP, and d)  
122 published in English. Studies involving participants with chronic pancreatitis, pancreatic cancer,  
123 or post-surgical pancreatitis were excluded, as were studies with animals, regression-based  
124 models, or models that predict the development of AP instead of disease outcomes. Studies  
125 published in abstract form only and review articles were also excluded.

126 We searched the databases MEDLINE (OvidSP) and EMBASE (OvidSP) from January 1, 2021 to  
127 December 31, 2023 (Date of search for all data sources, January 31<sup>st</sup>) Our search was limited to  
128 the most recent three years for the following reasons 1) Significant advancements in AP  
129 management paradigm has led to a significant change in the natural history/prognosis of the  
130 disease over the last decade [30-37]. It was important to identify models trained/evaluated on  
131 datasets generated from the most recent cohort of AP. 2) New algorithms rapidly emerge, replacing  
132 older algorithms and temporal quality degradation is an established phenomenon in AI models[38].  
133 Validated search strategies [39, 40] were used and are listed in Supplementary Tables 1 and 2,  
134 respectively. Covidence software (city, country) was used to screened title-abstract and full text in  
135 sequential steps. Each stage required concordance between two independent reviewers (LN, IL,  
136 KT, JP, AH, BC, NM, or AL). Disagreements were resolved by a third independent reviewer (PJJ  
137 or LAC). Included studies were then appraised in terms of risk of bias in study design,  
138 completeness of reporting, and for summarization of model predictive performances. Necessary  
139 data for PROBAST and TRIPOD+AI evaluation were extracted in accordance with the Critical  
140 Appraisal and Data Extraction for Systematic Reviews of Prediction Modelling Studies  
141 (CHARMS) checklist[41].

142 **Methodologic Quality Assessment:** The Prediction Model Risk of Bias Assessment Tool  
143 (PROBAST) was used to assess both risk of bias in study design of prospective models across four  
144 main domains: participants, predictors, outcomes, and analysis[42]. The assessment of  
145 Applicability section of PROBAST was planned if meta-data were appropriate and feasible for  
146 meta-analysis. To optimize the validity of the PROBAST assessment, all evaluators underwent  
147 PROBAST rater training, which entailed weekly meetings with an AP content expert trained by  
148 PROBAST developers (PJJ) to review all 20 signaling questions. Data scientists (JNA, LL, JQ,

149 or DR) and ML content experts (LAC) were engaged to accurately complete CHARMS and  
150 PROBAST. Each model was assessed via the PROBAST framework by two independent  
151 reviewers (LN, IL, KT, JP, AH, BC, NM, AL, JNA, LL, JQ, or DR), and disagreements were  
152 resolved by an independent third reviewer (PJL or LAC). The pair of reviewers comprised a  
153 clinician and a data scientist. The risk of bias in each domain and overall risk of bias were reported  
154 for all studies.

155 **Reporting Quality Assessment:** To assess the quality of the reporting, we decided to use  
156 TRIPOD+AI statement, which contains a comprehensive list of items that need to be reported for  
157 papers reporting development and/or validation of prognostic AI model[43]. List of sections and  
158 items on this list covers every key part of a manuscript including title, abstract, introduction,  
159 methods, results, and discussion. Additionally, it contains items related to open science and patient  
160 & public involvement. Summary statistics of quality of reporting according to the standards of  
161 TRIPOD+AI[43] were calculated for each study. This review has been registered at Research  
162 Registry ([reviewregistry1727](#)).

163 All data reporting in this systematic review adhered to the guidelines of Preferred Reporting Items  
164 for Systematic reviews and Meta-Analyses (PRISMA) and the checklist can be found in a separate  
165 supplementary file.

## 166 **RESULTS**

167 Metadata used to generate these results can be accessed at DOI:10.6084/m9.figshare.26078743.

168 Our search strategy identified 6480 studies published between January 2021 and December 2023,  
169 of which 30 met eligibility criteria (S1 Figure). Studies originated from China (22), the United  
170 States (4), Hungary (2), Turkey (1), and New Zealand (1) (Table 1).

171

**Table 1: Basic characteristics of included studies**

| <u>Author</u> | <u>Publication year</u> | <u>Study site</u>        | <u>Type of study</u>                                                       | <u>Number of centers</u> | <u>Number of participants</u> | <u>Racial category</u> | <u>Machine learning algorithms</u>                                                   | <u>AUC</u> | <u>Type of predictors included*</u> | <u>Outcome predicted†</u> |
|---------------|-------------------------|--------------------------|----------------------------------------------------------------------------|--------------------------|-------------------------------|------------------------|--------------------------------------------------------------------------------------|------------|-------------------------------------|---------------------------|
| Chen[44]      | 2023                    | China                    | Retrospective cohort                                                       | 1                        | 978                           | NR                     | Neural Network (incl. deep learning)                                                 | 0.82, 0.92 | 2, 3, 4                             | 1, 2                      |
| Ding[45]      | 2021                    | United States of America | Retrospective cohort                                                       | 1                        | 337                           | Reported               | Neural Network (incl. deep learning)                                                 | 0.77       | 1, 2, 3, 4                          | 3                         |
| Hameed[46]    | 2022                    | United States of America | Administrative database                                                    | 2                        | 6326                          | NR                     | Tree-based models                                                                    | 0.94       | 1, 4                                | 3                         |
| Hong[47]      | 2022                    | China                    | Retrospective cohort                                                       | 1                        | 648                           | NR                     | Tree-based models                                                                    | 0.96       | 1, 3, 4                             | 1                         |
| Ince[48]      | 2022                    | Turkey                   | Retrospective cohort                                                       | 1                        | 1334                          | NR                     | Other (Gradient Boost)                                                               | 0.91-0.98  | 1, 3, 4                             | 1,3,4                     |
| Jin[49]       | 2021                    | China                    | Retrospective cohort                                                       | 1                        | 369                           | NR                     | Neural Network (incl. deep learning)                                                 | 0.98       | 4                                   | 5                         |
| Kimita[50]    | 2022                    | New Zealand              | Prospective cohort                                                         | 1                        | 160                           | Reported               | Tree-based models                                                                    | 0.67       | 5                                   | 6                         |
| Kiss[51]      | 2022                    | Hungary                  | Prospective cohort                                                         | 30                       | 2387                          | NR                     | Tree-based models                                                                    | 0.76       | 1, 4                                | 7                         |
| Kui[52]       | 2022                    | Hungary                  | Prospective cohort                                                         | 28                       | 1184                          | NR                     | K-nearest neighbor                                                                   | 0.81       | 1, 2, 4                             | 1                         |
| Langmead[24]  | 2021                    | United States of America | Secondary analysis of prospective cohort study designed for another reason | 1                        | 133                           | Reported               | Tree-based models                                                                    | 0.91       | 5                                   | 1                         |
| Li[53]        | 2022                    | China                    | Prospective cohort                                                         | 7                        | 915                           | NR                     | Tree-based models<br>Support vector machine<br>Random Forest<br>LightGBM<br>Ensemble | 0.79-0.90  | 1, 2, 4                             | 2, 3, 4, 8, 9             |
| Liang[54]     | 2023                    | China                    | Administrative database                                                    | 1                        | 1798                          | NR                     | Neural Network (incl. deep learning)                                                 | 0.98       | 3                                   | 2, 5                      |
| Luo, Z[55]    | 2023                    | China                    | Retrospective cohort                                                       | 2                        | 673                           | NR                     | Naive Bayes                                                                          | 0.96       | 1, 3, 4                             | 1                         |
| Luo, J[56]    | 2023                    | China                    | Retrospective cohort                                                       | 1                        | 13645                         | NR                     | Neural Network (incl. deep learning)                                                 | 0.91       | 2, 4                                | 10                        |
| Ren[57]       | 2023                    | China                    | Retrospective cohort                                                       | 1                        | 531                           | NR                     | Tree-based models                                                                    | 0.81       | 1, 3, 4                             | 11                        |

|              |      |                          |                         |     |        |          |                                                                               |            |            |      |
|--------------|------|--------------------------|-------------------------|-----|--------|----------|-------------------------------------------------------------------------------|------------|------------|------|
| Shi[58]      | 2022 | China                    | Retrospective cohort    | 3   | 2846   | NR       | Tree-based models                                                             | 0.90, 0.98 | 1, 4       | 3, 5 |
| Thapa[59]    | 2022 | United States of America | Administrative database | 700 | 371885 | Reported | Tree-based models                                                             | 0.92       | 1, 2, 4    | 1    |
| Xu[60]       | 2021 | China                    | Retrospective cohort    | 3   | 447    | NR       | Other (Adaptive Boost)                                                        | 0.83       | 4, 5       | 10   |
| Yan[61]      | 2022 | China                    | Retrospective cohort    | 1   | 151    | NR       | Tree-based models                                                             | NR         | 2, 4       | 3    |
| Yang, D[62]  | 2022 | China                    | Retrospective cohort    | 1   | 996    | NR       | Tree-based models<br>Neural Network (incl. deep learning)<br>XGBoost          | 0.73-0.91  | 1, 2, 4    | 5    |
| Yang, Y[63]  | 2022 | China                    | Retrospective cohort    | 2   | 424    | NR       | Tree-based models                                                             | 0.91       | 1, 3, 4, 5 | 5    |
| Yang, D[64]  | 2023 | China                    | Retrospective cohort    | 1   | 292    | NR       | Tree-based models*                                                            | 0.995      | 4, 5       | 5    |
| Yin[65]      | 2022 | China                    | Retrospective cohort    | 3   | 1012   | NR       | Tree-based models<br>Gradient Boosting Machines<br>Neural Networks<br>XGBoost | 0.87-0.95  | 1, 3, 4    | 1    |
| Yuan[66]     | 2022 | China                    | Retrospective cohort    | 2   | 5280   | NR       | Tree-based models                                                             | 0.87       | 1, 2, 3, 4 | 4    |
| Zhang, W[67] | 2023 | China                    | Retrospective cohort    | 1   | 440    | NR       | Tree-based models                                                             | 0.93       | 1, 3, 4    | 5    |
| Zhang, J[68] | 2023 | China                    | Retrospective cohort    | 4   | 820    | NR       | CatBoost<br>Random Forest<br>Neural Network                                   | 0.52-0.75  | 1, 4       | 12   |
| Zhang, M[69] | 2023 | China                    | Retrospective cohort    | 1   | 460    | NR       | Bayesian Support Vector Machine<br>Ensembles of Decision Tree                 | 0.81-0.89  | 4          | 5    |
| Zhao[70]     | 2023 | China                    | Retrospective cohort    | 1   | 215    | NR       | Tree-based models                                                             | 0.89       | 3          | 2    |
| Zhou[71]     | 2022 | China                    | Retrospective cohort    | 1   | 441    | NR       | XGBoost                                                                       | 0.91       | 1, 3, 4    | 1    |
| Zhu[72]      | 2021 | China                    | Retrospective cohort    | 6   | 711    | NR       | Tree-based models<br>Neural network                                           | 0.99       | 1, 3, 4    | 13   |

\*Type of predictors included: 1 = Clinical history (incl. demographics, social, medical history), 2 = Physical Exam Findings, 3 = Radiologic features, 4 = Laboratory values, 5 = Cytokines/new biomarker



†Outcome(s) predicted: 1 = severe pancreatitis, 2 = mild acute pancreatitis, 3 = mortality (all-cause, acute pancreatitis specific, does not specify), 4 = intensive care unit admission, 5 = moderately severe and severe pancreatitis, 6= other, 7 = pancreatic necrosis, 8 = length of stay, 9 = pancreatic necrosis – infected, 10 = multisystem organ dysfunction/failure, 11 = recurrent pancreatitis, 12 = new onset diabetes, 13 = Intra-abdominal infection;

172 All 30 studies reported the development of a new ML-based prognostic model, but only one study  
173 included external validation step of the newly developed model. Nearly three-fourths (22/30) of  
174 included studies were retrospective cohort, while only five studies were prospective, of which one  
175 was a secondary analysis. Five studies developed more than one model, resulting in a total of 39  
176 models developed in 30 studies. The most common machine learning algorithms were tree-based  
177 models (20/39) and neural networks (7/39). AP severity (21/39) or mortality (6/39) were the most  
178 common outcomes predicted. The most common methods of internal validation were cross-  
179 validation (23/39) and bootstrapping (17/39). For 31/39 models, shrinkage methods were not used  
180 to evaluate for or adjust for optimism (shrinkage methods: techniques used to account for  
181 magnitude of noise in the dataset contributing to overinflation of predictive performance). A  
182 summary of pertinent descriptive statistics collected as per the CHARMS checklist is provided in  
183 Table 1. Overall, for the 39 models the mean area-under-the-curve (AUC) was 0.91 (SD 0.08).  
184 Six studies developed more than one ML-model using the same dataset, presenting the parameters  
185 of the “best performing” model (Table 1). Every model had at least one domain in which the risk  
186 of bias was classified as high (Fig 1), meaning that all 39 models were assessed to be at high risk  
187 of bias by PROBAST standards (see S3 Table for individual model’s ROB rating). The median  
188 number of TRIPOD+AI items that were reported on in the 30 studies was 15/27 (range 6-20). No  
189 study reported on all the items. A comprehensive breakdown of the number of TRIPOD+AI items  
190 reported on in each study is given in Supplementary Table 4 and on the heatmap for visual  
191 presentation of the data (Fig 2).

## 192 **Fig 1. Summary of Risk of Bias in 4 Domains Assessed by PROBAST**

## 193 **Fig 2. Heatmap depicting common areas of deficiencies in reporting standards as assessed**

194 **by TRIPOD+AI** \*Publication has same first author and year as another paper listed; PMID of each \* in  
195 ascending order: Yang et al, 2022: 35430680, 35607360. Luo et al, 2023: 36653317, 36773821. Zhang et al, 2023:  
196 36902504, 36964219, 37196588.

197

198 ***Risk of Bias in Four Domains of Methodology as Assessed by PROBAST***

199 PROBAST ratings of the 39 models based on individual studies are summarized in Supplementary  
200 Table 3. Assessment of Applicability was not applicable to the objectives of this review. As the  
201 primary objective was to assess the methodologic quality and because of marked heterogeneity of  
202 the cohorts and the different definitions and determination of outcomes, a synthesis of the meta-  
203 data was not undertaken.

204 *Participants Domain:* In this domain there was a high risk of bias with 35/39 models. The data  
205 source was not appropriate with 31/39 models. The inclusions and exclusions of participants was  
206 not appropriate in 26/39 models.

207 *Predictors Domain:* In this domain there was a high risk of bias with 18/39 models. The predictors  
208 were not defined and measured in a similar way for all participants in 12/39 models. Assessor  
209 blinding to the outcome data was not done with 30/39 models. In 8/39 studies predictors were  
210 included when the result would not be available at the time of applying the prognostic model.

211 *Outcomes Domain:* In this domain there was a high risk of bias with 24/39 models. While  
212 outcomes were *defined* in a standard way in 33/39 models, they were not *determined* appropriately  
213 in 20/39 models. The way that outcomes were determined was not reported for 1/39 models.  
214 Outcomes were not defined and determined in a similar way in 13/39 models. Blinding was not  
215 performed in 24/39 models. Outcomes were included as predictors in 17/39 models.

216 *Analysis Domain:* In this domain there was a high risk of bias with 37/39 models (Fig 1). The  
217 common deficiencies in this domain were no accounting for overfitting and optimism (i.e. no  
218 shrinkage methods employed) in 31/39 models, none or inappropriate reporting of data complexity  
219 in 38/39 models (Fig 2), insufficient sample size in 28/39 models, and selection of predictors relied  
220 solely on univariate analysis in 26/39 models.

221 ***Quality of Reporting as Assessed by TRIPOD+AI***

222 *Title, Abstract, Introduction Section:* All 30 studies reported to the standards of TRIPOD+AI  
223 except in one important sub-item. No study reported the health inequalities that may exist in  
224 outcomes between sociodemographic groups (Fig 2 and S4 Table).

225 *Methods Section:* Twenty-eight studies described The sources of data, study dates, setting and  
226 eligibility were described in 28/30 studies but only 5/30 studies reported details of any treatment  
227 received where treatment might have influences the outcome of interest. Other frequent omissions  
228 included no description of model fairness and their rationale (28/30), no sample size justification  
229 (23/30), no blinding of assessors (20/30), no reporting differences between training and evaluation  
230 data (16/30), no outcome measurement (15/30), no description of data preparation and pre-  
231 processing(13/30), no reporting of elements pertinent to outcome definition (13/30), and no  
232 assessment of study quality (13/30)

233 *Open Science and Patient/Public Involvement Section:* There was no reporting on whether a  
234 protocol was prepared, available or accessed in 25/30 studies. There was no report as to the  
235 availability of study data (9/30) or analytical code (28/30). There was comment on whether  
236 patients and public were involved in 26/30 studies.

237 *Results Section:* There was insufficient detail of the prediction model to allow external validation  
238 in 25/30 studies. Reporting details of the prediction model performance in key subgroups (e.g.  
239 sociodemographic) was not available in 15/30 studies.

240 *Discussion Section:* Items pertaining to the usability of the model in the context of current care  
241 were usually not discussed. Only 3/30 studies described how poor quality or missing data should  
242 be handled with clinical implementation of the model. Only 1/30 study specified whether users

243 will be required to interact with handling of the input data or use of the model and what level of  
244 expertise is required to use the model.

245 *Rationale against performing subgroup analyses:* Even though several of the included studies  
246 developed models predicting similar outcomes, decision was made not to perform subgroup  
247 analyses stratified by similar endpoints. All but one model was judged to have high risk of bias in  
248 at least two out of the four PROBAST domains and none of the models were at low risk of bias in  
249 the statistical analyses domain. With such limitations in the methodology across the board,  
250 subgroup analyses were felt not to lead to meaningful discoveries or different conclusions.

## 251 **DISCUSSION**

252 In this systematic review, we assessed the quality of the methodology and reporting of studies  
253 that develop and/or validated non-regression ML-based models in AP literature. While the  
254 performance of the published models was high (mean AUC 0.91), we identified several key  
255 limitations in the recently published models. Unfortunately, these shortcomings are like those  
256 identified in other fields such as oncology[28] and anesthesiology[73]. First, the concern relates  
257 to the high risk of bias most notably in the statistical analysis section, which can undermine the  
258 validity of the models. Second, due to the lack of external validation studies, generalizability of  
259 the ML models may be limited. Third relates to open science practice, where in over 90% of the  
260 studies, the code was not shared and no information was provided on how the model was built.  
261 Additionally, there was a lack of reporting on how the ML model can be implemented in clinical  
262 practice. Lastly, none of the studies described potential health inequities among different  
263 sociodemographic groups, which risks widening disparities in healthcare, if implemented in real  
264 clinical practice.

265 The quality of the statistical analyses is one of the most important facets of model development.  
266 The PROBAST ROB tool dedicates 9 signaling questions to this domain[42]. Two particularly  
267 deficient areas were sample size justification and guarding against overfitting. A robust sample  
268 size (especially for a ML model) and guarding against overfitting are critically important. When  
269 these steps are omitted, a model may perform well in the development dataset but the predictive  
270 performance may not be reproducible[74]. We found that most published studies developed a  
271 model with a sample size of less than 1,000 participants and median events per variable was 9.5.  
272 Even for regression-based models, the minimum recommended events per variable is 20[42].  
273 While events per variable is not a singular reflection of sufficient sample size, it is generally  
274 accepted that ML models require much larger sample size (than regression-based models) due to  
275 the risk of model instability[75].

276 Potentially limited generalizability of the published models need to be highlighted. Only one  
277 study conducted external validation but with limitations, all but 5 studies were single-center  
278 design. While AP is a common gastrointestinal disease, with an annual worldwide 1 million new  
279 cases a year[76], international or large multi-center consortiums with efforts to build a  
280 generalizable model have been lacking. Lack of such collaboration results in siloed attempts at  
281 building models that may not be clinically utilized due to poor reproducibility and  
282 generalizability. As with the case with the regression-based models[21], we are seeing a similar  
283 trend in ML-based models in AP.

284 Ultimately, prognostic models are built to aid clinical decision making or enhance cohort  
285 enrichment in a research study. Therefore, steps need to be taken to thoughtfully consider real-  
286 life issues we will face when trying to deploy these models (e.g., ways to deal with missing  
287 values in real clinical practice when patients won't have the data elements necessary for the ML

288 model). We also found key missing items relevant to open science, that limit external validation  
289 studies by other investigators and clinical implementation by the hospitals. For example, only 5  
290 studies shared the code to permit third-party evaluation and implementation, only 3 studies gave  
291 guidance on how to handle missing data, and one study detailed the specifics of what constitutes  
292 human-AI interaction. As important, aspects of model building relevant healthcare equity (e.g.,  
293 comparison of performance estimates among different sociodemographic subgroups) were not  
294 evaluated. Such deficiency leads to a potential to produce a model that widens the  
295 socioeconomic disparities[77].

296 Our study has several strengths. For transparency and rigor of our methodology we have  
297 published our methods and adhered strictly to the standards of TRIPOD-SR/MA. Our work was  
298 conducted in collaboration between data scientists, ML methodologist, and content experts in  
299 AP, which we believe enhances the reliability of our findings. There are multiple aspects to  
300 PROBAST and TRIPOD+AI assessment that require both AP content and ML methodology  
301 expertise. Third, rigorous internal training for PROBAST assessment preceded the project,  
302 enhancing the validity of our ROS assessment.

303 Several limitations deserve mention. Our search strategy extended only the last 3 years so it is  
304 possible that our findings may not be fully representative of all the ML models published for AP  
305 thus far. Second, while PROBAST was developed by expert methodologists, it is possible that  
306 models deemed high ROB by PROBAST may still be valid, reproducible, and generalizable in  
307 AP. However, there is emerging data from other diseases that suggest models deemed high ROB  
308 by PROBAST perform poorly external validation studies[78, 79]

309 In conclusion, the potential benefit of ML-based prognostic models is evident with an overall  
310 high AUC (mean  $0.91 \pm 0.8SD$ ). However, this study indicates that there should be great caution

311 in implementing the reported models because of the very major concerns with the quality of the  
312 methodology and reporting. These raise questions about the validity, reproducibility, and  
313 generalizability of the prognostic models. It is recommended that AP-specific, standardized  
314 methodology that covers all 4 PROBAST domains and all items within TRIPOD+AI be used in  
315 developing and validating ML-based prognostic models. Only then should implementation be  
316 considered. Our study findings provide valuable baseline assessment of the quality of methods  
317 and reporting of ML-based models in AP. It is also timely given the recent publication of  
318 TRIPOD+AI[43], which we hope will encourage future investigators to utilize.

319

320 **ACKNOWLEDGEMENTS:** none

321

322

323

324

325

326

327

328

329

330

331

332

333



334 **REFERENCES**

- 335 1. Xiao AY, Tan ML, Wu LM, Asrani VM, Windsor JA, Yadav D, Petrov MS. Global incidence  
336 and mortality of pancreatic diseases: a systematic review, meta-analysis, and meta-regression of  
337 population-based cohort studies. *Lancet Gastroenterol Hepatol.* 2016;1(1):45-55. Epub  
338 20160628. doi: 10.1016/s2468-1253(16)30004-8. PubMed PMID: 28404111.
- 339 2. Iannuzzi JP, King JA, Leong JH, Quan J, Windsor JW, Tanyingoh D, et al. Global  
340 Incidence of Acute Pancreatitis Is Increasing Over Time: A Systematic Review and Meta-Analysis.  
341 *Gastroenterology.* 2022;162(1):122-34. Epub 20210925. doi: 10.1053/j.gastro.2021.09.043.  
342 PubMed PMID: 34571026.
- 343 3. Lee PJ, Papachristou GI. New insights into acute pancreatitis. *Nature reviews*  
344 *Gastroenterology & hepatology.* 2019. doi: 10.1038/s41575-019-0158-2.
- 345 4. Banks PA, Bollen TL, Dervenis C, Gooszen HG, Johnson CD, Sarr MG, et al.  
346 Classification of acute pancreatitis--2012: revision of the Atlanta classification and definitions by  
347 international consensus. *Gut.* 2013;62(1):102-11. doi: 10.1136/gutjnl-2012-302779 [doi].
- 348 5. Dellinger EP, Forsmark CE, Layer P, Levy P, Maravi-Poma E, Petrov MS, et al.  
349 Determinant-based classification of acute pancreatitis severity: an international multidisciplinary  
350 consultation. *Annals of surgery.* 2012;256(6):875-80. doi: 10.1097/SLA.0b013e318256f778.
- 351 6. Wu D, Lu B, Xue H-D, Yang H, Qian J-M, Lee P, Windsor JA. Validation of Modified  
352 Determinant-Based Classification of severity for acute pancreatitis in a tertiary teaching hospital.  
353 *Pancreatology : official journal of the International Association of Pancreatology (IAP)* [et al].  
354 2019;19(2):217-23. doi: 10.1016/j.pan.2019.01.003.
- 355 7. Petrov MS, Yadav D. Global epidemiology and holistic prevention of pancreatitis. *Nat Rev*  
356 *Gastroenterol Hepatol.* 2019;16(3):175-84. doi: 10.1038/s41575-018-0087-5. PubMed PMID:  
357 30482911; PubMed Central PMCID: PMC6597260.
- 358 8. Das SL, Singh PP, Phillips AR, Murphy R, Windsor JA, Petrov MS. Newly diagnosed  
359 diabetes mellitus after acute pancreatitis: a systematic review and meta-analysis. *Gut.*  
360 2014;63(5):818-31. doi: 10.1136/gutjnl-2013-305062 [doi].
- 361 9. Huang W, de la Iglesia-García D, Baston-Rey I, Calviño-Suarez C, Lariño-Noia J, Iglesias-  
362 Garcia J, et al. Exocrine Pancreatic Insufficiency Following Acute Pancreatitis: Systematic Review  
363 and Meta-Analysis. *Digestive diseases and sciences.* 2019;64(7):1985-2005. doi:  
364 10.1007/s10620-019-05568-9.
- 365 10. Zhi M, Zhu X, Lugea A, Waldron RT, Pandol SJ, Li L. Incidence of New Onset Diabetes  
366 Mellitus Secondary to Acute Pancreatitis: A Systematic Review and Meta-Analysis. *Front Physiol.*  
367 2019;10:637. Epub 20190531. doi: 10.3389/fphys.2019.00637. PubMed PMID: 31231233;  
368 PubMed Central PMCID: PMC6558372.
- 369 11. Abu-El-Hajja M, Gukovskaya AS, Andersen DK, Gardner TB, Hegyi P, Pandol SJ, et al.  
370 Accelerating the Drug Delivery Pipeline for Acute and Chronic Pancreatitis: Summary of the  
371 Working Group on Drug Development and Trials in Acute Pancreatitis at the National Institute of  
372 Diabetes and Digestive and Kidney Diseases Workshop. *Pancreas*2018. p. 1185-92.
- 373 12. Uc A, Andersen DK, Borowitz D, Glesby MJ, Mayerle J, Sutton R, Pandol SJ. Accelerating  
374 the Drug Delivery Pipeline for Acute and Chronic Pancreatitis-Knowledge Gaps and Research  
375 Opportunities: Overview Summary of a National Institute of Diabetes and Digestive and Kidney  
376 Diseases Workshop. *Pancreas*2018. p. 1180-4.
- 377 13. Serrano J, Laughlin MR, Bellin MD, Yadav D, Chinchilli VM, Andersen DK. Type 1  
378 Diabetes in Acute Pancreatitis Consortium: From Concept to Reality. *Pancreas.* 2022;51(6):563-  
379 7. doi: 10.1097/mpa.0000000000002073. PubMed PMID: 36206459; PubMed Central PMCID:  
380 PMC69555854.
- 381 14. van Brunschot S, van Grinsven J, Voermans RP, Bakker OJ, Besselink MG, Boermeester  
382 MA, et al. Transluminal endoscopic step-up approach versus minimally invasive surgical step-up  
383 approach in patients with infected necrotising pancreatitis (TENSION trial): design and rationale

- 384 of a randomised controlled multicenter trial [ISRCTN09186711. BMC gastroenterology.  
385 2013;13:161-. doi: 10.1186/1471-230X-13-161 [doi].
- 386 15. van Santvoort HC, Besselink MG, Bakker OJ, Hofker HS, Boermeester MA, Dejong CH,  
387 et al. A step-up approach or open necrosectomy for necrotizing pancreatitis. The New England  
388 journal of medicine. 2010;362(16):1491-502. doi: 10.1056/NEJMoa0908821 [doi].
- 389 16. Giamarellos-Bourboulis EJ, Aschenbrenner AC, Bauer M, Bock C, Calandra T, Gat-Viks  
390 I, et al. The pathophysiology of sepsis and precision-medicine-based immunotherapy. Nature  
391 Immunology. 2024;25(1):19-28. doi: 10.1038/s41590-023-01660-5.
- 392 17. Rosenson RS, Gaudet D, Ballantyne CM, Baum SJ, Bergeron J, Kershaw EE, et al.  
393 Evinacumab in severe hypertriglyceridemia with or without lipoprotein lipase pathway mutations:  
394 a phase 2 randomized trial. Nat Med. 2023;29(3):729-37. Epub 20230306. doi: 10.1038/s41591-  
395 023-02222-w. PubMed PMID: 36879129; PubMed Central PMCID: PMCPCMC10033404.
- 396 18. Raita Y, Goto T, Faridi MK, Brown DFM, Camargo CA, Jr., Hasegawa K. Emergency  
397 department triage prediction of clinical outcomes using machine learning models. Critical care  
398 (London, England). 2019;23(1):64-. doi: 10.1186/s13054-019-2351-7.
- 399 19. Capurso G, Ponz de Leon Pisani R, Lauri G, Archibugi L, Hegyi P, Papachristou GI, et al.  
400 Clinical usefulness of scoring systems to predict severe acute pancreatitis: A systematic review  
401 and meta-analysis with pre and post-test probability assessment. United European Gastroenterol  
402 J. 2023;11(9):825-36. Epub 20230927. doi: 10.1002/ueg2.12464. PubMed PMID: 37755341;  
403 PubMed Central PMCID: PMCPCMC10637128.
- 404 20. Papachristou GI, Muddana V, Yadav D, O'Connell M, Sanders MK, Slivka A, Whitcomb  
405 DC. Comparison of BISAP, Ranson's, APACHE-II, and CTSI scores in predicting organ failure,  
406 complications, and mortality in acute pancreatitis. The American journal of gastroenterology.  
407 2010;105(2):435-41; quiz 42. doi: 10.1038/ajg.2009.622.
- 408 21. Mounzer R, Langmead CJ, Wu BU, Evans AC, Bishehsari F, Muddana V, et al.  
409 Comparison of existing clinical scoring systems to predict persistent organ failure in patients with  
410 acute pancreatitis. Gastroenterology. 2012;142(7):1476-. doi: 10.1053/j.gastro.2012.03.005.
- 411 22. Sidey-Gibbons JAM, Sidey-Gibbons CJ. Machine learning in medicine: a practical  
412 introduction. BMC Med Res Methodol. 2019;19(1):64. Epub 20190319. doi: 10.1186/s12874-019-  
413 0681-4. PubMed PMID: 30890124; PubMed Central PMCID: PMCPCMC6425557.
- 414 23. Zhou Y, Ge YT, Shi XL, Wu KY, Chen WW, Ding YB, et al. Machine learning predictive  
415 models for acute pancreatitis: A systematic review. Int J Med Inform. 2022;157:104641. Epub  
416 20211110. doi: 10.1016/j.ijmedinf.2021.104641. PubMed PMID: 34785488.
- 417 24. Langmead C, Lee PJ, Paragomi P, Greer P, Stello K, Hart PA, et al. A Novel 5-Cytokine  
418 Panel Outperforms Conventional Predictive Markers of Persistent Organ Failure in Acute  
419 Pancreatitis. Clinical and translational gastroenterology. 2021;12(5):e00351-e. doi:  
420 10.14309/ctg.0000000000000351.
- 421 25. Fei Y, Gao K, Li W-Q. Artificial neural network algorithm model as powerful tool to predict  
422 acute lung injury following to severe acute pancreatitis. Pancreatology : official journal of the  
423 International Association of Pancreatology (IAP) [et al]. 2018;18(8):892-9. doi:  
424 10.1016/j.pan.2018.09.007.
- 425 26. Andaur Navarro CL, Damen JAA, Takada T, Nijman SWJ, Dhiman P, Ma J, et al.  
426 Systematic review finds "spin" practices and poor reporting standards in studies on machine  
427 learning-based prediction models. J Clin Epidemiol. 2023;158:99-110. Epub 20230405. doi:  
428 10.1016/j.jclinepi.2023.03.024. PubMed PMID: 37024020.
- 429 27. Andaur Navarro CL, Damen JAA, van Smeden M, Takada T, Nijman SWJ, Dhiman P, et  
430 al. Systematic review identifies the design and methodological conduct of studies on machine  
431 learning-based prediction models. J Clin Epidemiol. 2023;154:8-22. Epub 20221125. doi:  
432 10.1016/j.jclinepi.2022.11.015. PubMed PMID: 36436815.
- 433 28. Dhiman P, Ma J, Andaur Navarro CL, Speich B, Bullock G, Damen JAA, et al.  
434 Overinterpretation of findings in machine learning prediction model studies in oncology: a

- 435 systematic review. *J Clin Epidemiol.* 2023;157:120-33. Epub 20230317. doi:  
436 10.1016/j.jclinepi.2023.03.012. PubMed PMID: 36935090.
- 437 29. Hassan A, Critelli B, Lahooti I, Lahooti A, Matzko N, Adams JN, et al. Critical appraisal of  
438 machine learning prognostic models for acute pancreatitis: protocol for a systematic review. *Diagn*  
439 *Progn Res.* 2024;8(1):6. Epub 20240402. doi: 10.1186/s41512-024-00169-1. PubMed PMID:  
440 38561864; PubMed Central PMCID: PMCPCMC10986113.
- 441 30. van Dijk SM, Hallensleben ND, van Santvoort HC, Fockens P, van Goor H, Bruno MJ,  
442 Besselink MG. Acute pancreatitis: recent advances through randomised trials. *Gut.*  
443 2017;66(11):2024-32. doi: 10.1136/gutjnl-2016-313595.
- 444 31. de-Madaria E, Buxbaum JL, Maisonneuve P, García García de Paredes A, Zapater P,  
445 Guilabert L, et al. Aggressive or Moderate Fluid Resuscitation in Acute Pancreatitis. *The New*  
446 *England journal of medicine.* 2022;387(11):989-1000. doi: 10.1056/NEJMoa2202884.
- 447 32. Wolbrink DRJ, van de Poll MCG, Termorshuizen F, de Keizer NF, van der Horst ICC,  
448 Schnabel R, et al. Trends in Early and Late Mortality in Patients With Severe Acute Pancreatitis  
449 Admitted to ICUs: A Nationwide Cohort Study. *Crit Care Med.* 2022;50(10):1513-21. Epub  
450 20220725. doi: 10.1097/ccm.0000000000005629. PubMed PMID: 35876365.
- 451 33. Sorrento C, Shah I, Yakah W, Ahmed A, Tintara S, Kandasamy C, et al. Inpatient Alcohol  
452 Cessation Counseling Is Associated With a Lower 30-Day Hospital Readmission in Acute  
453 Alcoholic Pancreatitis. *J Clin Gastroenterol.* 2022;56(9):e313-e7. Epub 20220110. doi:  
454 10.1097/mcg.0000000000001666. PubMed PMID: 34999646.
- 455 34. Onnekink AM, Boxhoorn L, Timmerhuis HC, Bac ST, Besselink MG, Boermeester MA, et  
456 al. Endoscopic Versus Surgical Step-Up Approach for Infected Necrotizing Pancreatitis  
457 (EXTENSION): Long-term Follow-up of a Randomized Trial. *Gastroenterology.* 2022;163(3):712-  
458 22.e14. Epub 20220514. doi: 10.1053/j.gastro.2022.05.015. PubMed PMID: 35580661.
- 459 35. Hallensleben ND, Timmerhuis HC, Hollemans RA, Pocornie S, van Grinsven J, van  
460 Brunschot S, et al. Optimal timing of cholecystectomy after necrotising biliary pancreatitis. *Gut.*  
461 2022;71(5):974-82. Epub 20210716. doi: 10.1136/gutjnl-2021-324239. PubMed PMID:  
462 34272261.
- 463 36. Sissingh NJ, Groen JV, Koole D, Klok FA, Boekestijn B, Bollen TL, et al. Therapeutic  
464 anticoagulation for splanchnic vein thrombosis in acute pancreatitis: A systematic review and  
465 meta-analysis. *Pancreatology.* 2022;22(2):235-43. Epub 20211222. doi:  
466 10.1016/j.pan.2021.12.008. PubMed PMID: 35012902.
- 467 37. Schepers NJ, Bakker OJ, Besselink MG, Ahmed Ali U, Bollen TL, Gooszen HG, et al.  
468 Impact of characteristics of organ failure and infected necrosis on mortality in necrotising  
469 pancreatitis. *Gut.* 2018.
- 470 38. Vela D, Sharp A, Zhang R, Nguyen T, Hoang A, Pinykh OS. Temporal quality degradation  
471 in AI models. *Scientific Reports.* 2022;12(1):11654. doi: 10.1038/s41598-022-15245-z.
- 472 39. Geersing GJ, Bouwmeester W, Zuithoff P, Spijker R, Leeflang M, Moons KG. Search filters  
473 for finding prognostic and diagnostic prediction studies in Medline to enhance systematic reviews.  
474 *PLoS One.* 2012;7(2):e32844. Epub 20120229. doi: 10.1371/journal.pone.0032844. PubMed  
475 PMID: 22393453; PubMed Central PMCID: PMCPCMC3290602.
- 476 40. Ingui BJ, Rogers MA. Searching for clinical prediction rules in MEDLINE. *J Am Med Inform*  
477 *Assoc.* 2001;8(4):391-7. doi: 10.1136/jamia.2001.0080391. PubMed PMID: 11418546; PubMed  
478 Central PMCID: PMCPCMC130084.
- 479 41. Moons KGM, de Groot JAH, Bouwmeester W, Vergouwe Y, Mallett S, Altman DG, et al.  
480 Critical Appraisal and Data Extraction for Systematic Reviews of Prediction Modelling Studies:  
481 The CHARMS Checklist. *PLOS Medicine.* 2014;11(10):e1001744. doi:  
482 10.1371/journal.pmed.1001744.
- 483 42. Wolff RF, Moons KGM, Riley RD, Whiting PF, Westwood M, Collins GS, et al. PROBAST:  
484 A Tool to Assess the Risk of Bias and Applicability of Prediction Model Studies. *Annals of internal*  
485 *medicine.* 2019;170(1):51-8. doi: 10.7326/M18-1376.

- 486 43. Collins GS, Moons KGM, Dhiman P, Riley RD, Beam AL, Van Calster B, et al. TRIPOD+AI  
487 statement: updated guidance for reporting clinical prediction models that use regression or  
488 machine learning methods. *BMJ*. 2024;385:e078378. doi: 10.1136/bmj-2023-078378.
- 489 44. Chen Z, Wang Y, Zhang H, Yin H, Hu C, Huang Z, et al. Deep Learning Models for Severity  
490 Prediction of Acute Pancreatitis in the Early Phase From Abdominal Nonenhanced Computed  
491 Tomography Images. *Pancreas*. 2023;52(1):e45-e53. doi: 10.1097/mpa.0000000000002216.  
492 PubMed PMID: 37378899.
- 493 45. Ding N, Guo C, Li C, Zhou Y, Chai X. An Artificial Neural Networks Model for Early  
494 Predicting In-Hospital Mortality in Acute Pancreatitis in MIMIC-III. *Biomed Res Int*.  
495 2021;2021:6638919. Epub 20210128. doi: 10.1155/2021/6638919. PubMed PMID: 33575333;  
496 PubMed Central PMCID: PMCPMC7864739.
- 497 46. Hameed MAB, Alamgir Z. Improving mortality prediction in Acute Pancreatitis by machine  
498 learning and data augmentation. *Comput Biol Med*. 2022;150:106077. Epub 20220911. doi:  
499 10.1016/j.compbimed.2022.106077. PubMed PMID: 36137318.
- 500 47. Hong W, Lu Y, Zhou X, Jin S, Pan J, Lin Q, et al. Usefulness of Random Forest Algorithm  
501 in Predicting Severe Acute Pancreatitis. *Front Cell Infect Microbiol*. 2022;12:893294. Epub  
502 20220610. doi: 10.3389/fcimb.2022.893294. PubMed PMID: 35755843; PubMed Central PMCID:  
503 PMCPMC9226542.
- 504 48. İnce AT, Silahtaroglu G, Seven G, Koçhan K, Yıldız K, Şentürk H. Early prediction of the  
505 severe course, survival, and ICU requirements in acute pancreatitis by artificial intelligence.  
506 *Pancreatol*. 2023;23(2):176-86. Epub 20221230. doi: 10.1016/j.pan.2022.12.005. PubMed  
507 PMID: 36610872.
- 508 49. Jin X, Ding Z, Li T, Xiong J, Tian G, Liu J. Comparison of MPL-ANN and PLS-DA models  
509 for predicting the severity of patients with acute pancreatitis: An exploratory study. *Am J Emerg*  
510 *Med*. 2021;44:85-91. Epub 20210122. doi: 10.1016/j.ajem.2021.01.044. PubMed PMID:  
511 33582613.
- 512 50. Kimita W, Bharmal SH, Ko J, Petrov MS. Identifying endotypes of individuals after an  
513 attack of pancreatitis based on unsupervised machine learning of multiplex cytokine profiles.  
514 *Transl Res*. 2023;251:54-62. Epub 20220718. doi: 10.1016/j.trsl.2022.07.001. PubMed PMID:  
515 35863673.
- 516 51. Kiss S, Pintér J, Molontay R, Nagy M, Farkas N, Sipos Z, et al. Early prediction of acute  
517 necrotizing pancreatitis by artificial intelligence: a prospective cohort-analysis of 2387 cases. *Sci*  
518 *Rep*. 2022;12(1):7827. Epub 20220512. doi: 10.1038/s41598-022-11517-w. PubMed PMID:  
519 35552440; PubMed Central PMCID: PMCPMC9098474.
- 520 52. Kui B, Pintér J, Molontay R, Nagy M, Farkas N, Gede N, et al. EASY-APP: An artificial  
521 intelligence model and application for early and easy prediction of severity in acute pancreatitis.  
522 *Clin Transl Med*. 2022;12(6):e842. doi: 10.1002/ctm2.842. PubMed PMID: 35653504; PubMed  
523 Central PMCID: PMCPMC9162438.
- 524 53. Li JN, Mu D, Zheng SC, Tian W, Wu ZY, Meng J, et al. Machine learning improves  
525 prediction of severity and outcomes of acute pancreatitis: a prospective multi-center cohort study.  
526 *Sci China Life Sci*. 2023;66(8):1934-7. Epub 20230516. doi: 10.1007/s11427-022-2333-8.  
527 PubMed PMID: 37209250.
- 528 54. Liang H, Wang M, Wen Y, Du F, Jiang L, Geng X, et al. Predicting acute pancreatitis  
529 severity with enhanced computed tomography scans using convolutional neural networks. *Sci*  
530 *Rep*. 2023;13(1):17514. Epub 20231016. doi: 10.1038/s41598-023-44828-7. PubMed PMID:  
531 37845380; PubMed Central PMCID: PMCPMC10579320.
- 532 55. Luo Z, Shi J, Fang Y, Pei S, Lu Y, Zhang R, et al. Development and evaluation of machine  
533 learning models and nomogram for the prediction of severe acute pancreatitis. *J Gastroenterol*  
534 *Hepatol*. 2023;38(3):468-75. Epub 20230127. doi: 10.1111/jgh.16125. PubMed PMID: 36653317.

- 535 56. Luo J, Lan L, Huang S, Zeng X, Xiang Q, Li M, et al. Real-time prediction of organ failures  
536 in patients with acute pancreatitis using longitudinal irregular data. *J Biomed Inform.*  
537 2023;139:104310. Epub 20230210. doi: 10.1016/j.jbi.2023.104310. PubMed PMID: 36773821.
- 538 57. Ren W, Zou K, Chen Y, Huang S, Luo B, Jiang J, et al. Application of a Machine Learning  
539 Predictive Model for Recurrent Acute Pancreatitis. *J Clin Gastroenterol.* 2023. Epub 20231103.  
540 doi: 10.1097/mcg.0000000000001936. PubMed PMID: 37983784.
- 541 58. Shi N, Lan L, Luo J, Zhu P, Ward TRW, Szatmary P, et al. Predicting the Need for  
542 Therapeutic Intervention and Mortality in Acute Pancreatitis: A Two-Center International Study  
543 Using Machine Learning. *J Pers Med.* 2022;12(4). Epub 20220411. doi: 10.3390/jpm12040616.  
544 PubMed PMID: 35455733; PubMed Central PMCID: PMCPCMC9031087.
- 545 59. Thapa R, Iqbal Z, Garikipati A, Siefkas A, Hoffman J, Mao Q, Das R. Early prediction of  
546 severe acute pancreatitis using machine learning. *Pancreatol.* 2022;22(1):43-50. Epub  
547 20211016. doi: 10.1016/j.pan.2021.10.003. PubMed PMID: 34690046.
- 548 60. Xu F, Chen X, Li C, Liu J, Qiu Q, He M, et al. Prediction of Multiple Organ Failure  
549 Complicated by Moderately Severe or Severe Acute Pancreatitis Based on Machine Learning: A  
550 Multicenter Cohort Study. *Mediators Inflamm.* 2021;2021:5525118. Epub 20210503. doi:  
551 10.1155/2021/5525118. PubMed PMID: 34054342; PubMed Central PMCID: PMCPCMC8112913.
- 552 61. Yan J, Yilin H, Di W, Jie W, Hanyue W, Ya L, Jie P. A nomogram for predicting the risk of  
553 mortality in patients with acute pancreatitis and Gram-negative bacilli infection. *Front Cell Infect*  
554 *Microbiol.* 2022;12:1032375. Epub 20221110. doi: 10.3389/fcimb.2022.1032375. PubMed PMID:  
555 36439207; PubMed Central PMCID: PMCPCMC9685314.
- 556 62. Yang D, Zhao L, Kang J, Wen C, Li Y, Ren Y, et al. Development and validation of a  
557 predictive model for acute kidney injury in patients with moderately severe and severe acute  
558 pancreatitis. *Clin Exp Nephrol.* 2022;26(8):770-87. Epub 20220416. doi: 10.1007/s10157-022-  
559 02219-8. PubMed PMID: 35430680.
- 560 63. Yang Y, Xiao W, Liu X, Zhang Y, Jin X, Li X. Machine Learning-Assisted Ensemble  
561 Analysis for the Prediction of Acute Pancreatitis with Acute Kidney Injury. *Int J Gen Med.*  
562 2022;15:5061-72. Epub 20220517. doi: 10.2147/ijgm.S361330. PubMed PMID: 35607360;  
563 PubMed Central PMCID: PMCPCMC9123915.
- 564 64. Yang D, Kang J, Li Y, Wen C, Yang S, Ren Y, et al. Development of a predictive nomogram  
565 for acute respiratory distress syndrome in patients with acute pancreatitis complicated with acute  
566 kidney injury. *Ren Fail.* 2023;45(2):2251591. Epub 20230919. doi:  
567 10.1080/0886022x.2023.2251591. PubMed PMID: 37724533; PubMed Central PMCID:  
568 PMCPCMC10512859.
- 569 65. Yin M, Zhang R, Zhou Z, Liu L, Gao J, Xu W, et al. Automated Machine Learning for the  
570 Early Prediction of the Severity of Acute Pancreatitis in Hospitals. *Front Cell Infect Microbiol.*  
571 2022;12:886935. Epub 20220610. doi: 10.3389/fcimb.2022.886935. PubMed PMID: 35755847;  
572 PubMed Central PMCID: PMCPCMC9226483.
- 573 66. Yuan L, Ji M, Wang S, Wen X, Huang P, Shen L, Xu J. Machine learning model identifies  
574 aggressive acute pancreatitis within 48 h of admission: a large retrospective study. *BMC Med*  
575 *Inform Decis Mak.* 2022;22(1):312. Epub 20221129. doi: 10.1186/s12911-022-02066-3. PubMed  
576 PMID: 36447180; PubMed Central PMCID: PMCPCMC9707001.
- 577 67. Zhang W, Chang Y, Ding Y, Zhu Y, Zhao Y, Shi R. To Establish an Early Prediction Model  
578 for Acute Respiratory Distress Syndrome in Severe Acute Pancreatitis Using Machine Learning  
579 Algorithm. *J Clin Med.* 2023;12(5). Epub 20230221. doi: 10.3390/jcm12051718. PubMed PMID:  
580 36902504; PubMed Central PMCID: PMCPCMC10002486.
- 581 68. Zhang J, Lv Y, Hou J, Zhang C, Yua X, Wang Y, et al. Machine learning for post-acute  
582 pancreatitis diabetes mellitus prediction and personalized treatment recommendations. *Sci Rep.*  
583 2023;13(1):4857. Epub 20230324. doi: 10.1038/s41598-023-31947-4. PubMed PMID: 36964219;  
584 PubMed Central PMCID: PMCPCMC10038980.

- 585 69. Zhang M, Pang M. Early prediction of acute respiratory distress syndrome complicated by  
586 acute pancreatitis based on four machine learning models. *Clinics (Sao Paulo)*. 2023;78:100215.  
587 Epub 20230503. doi: 10.1016/j.clinsp.2023.100215. PubMed PMID: 37196588; PubMed Central  
588 PMCID: PMC10199163.
- 589 70. Zhao Y, Wei J, Xiao B, Wang L, Jiang X, Zhu Y, He W. Early prediction of acute  
590 pancreatitis severity based on changes in pancreatic and peripancreatic computed tomography  
591 radiomics nomogram. *Quant Imaging Med Surg*. 2023;13(3):1927-36. Epub 20230201. doi:  
592 10.21037/qims-22-821. PubMed PMID: 36915340; PubMed Central PMCID:  
593 PMC10006146.
- 594 71. Zhou Y, Han F, Shi XL, Zhang JX, Li GY, Yuan CC, et al. Prediction of the severity of  
595 acute pancreatitis using machine learning models. *Postgrad Med*. 2022;134(7):703-10. Epub  
596 20220712. doi: 10.1080/00325481.2022.2099193. PubMed PMID: 35801388.
- 597 72. Zhu C, Zhang S, Zhong H, Gu Z, Kang Y, Pan C, et al. Intra-abdominal infection in acute  
598 pancreatitis in eastern China: microbiological features and a prediction model. *Ann Transl Med*.  
599 2021;9(6):477. doi: 10.21037/atm-21-399. PubMed PMID: 33850874; PubMed Central PMCID:  
600 PMC10006146.
- 601 73. Arina P, Kaczorek MR, Hofmaenner DA, Pisciotta W, Refinetti P, Singer M, et al.  
602 Prediction of Complications and Prognostication in Perioperative Medicine: A Systematic Review  
603 and PROBAST Assessment of Machine Learning Tools. *Anesthesiology*. 2024;140(1):85-101.  
604 doi: 10.1097/aln.0000000000004764. PubMed PMID: 37944114.
- 605 74. Kakarmath S, Esteva A, Arnaout R, Harvey H, Kumar S, Muse E, et al. Best practices for  
606 authors of healthcare-related artificial intelligence manuscripts. *NPJ Digit Med*. 2020;3:134. Epub  
607 20201016. doi: 10.1038/s41746-020-00336-w. PubMed PMID: 33083569; PubMed Central  
608 PMCID: PMC10006146.
- 609 75. van der Ploeg T, Austin PC, Steyerberg EW. Modern modelling techniques are data  
610 hungry: a simulation study for predicting dichotomous endpoints. *BMC Medical Research*  
611 *Methodology*. 2014;14(1):137. doi: 10.1186/1471-2288-14-137.
- 612 76. Li CL, Jiang M, Pan CQ, Li J, Xu LG. The global, regional, and national burden of acute  
613 pancreatitis in 204 countries and territories, 1990-2019. *BMC Gastroenterol*. 2021;21(1):332.  
614 Epub 20210825. doi: 10.1186/s12876-021-01906-2. PubMed PMID: 34433418; PubMed Central  
615 PMCID: PMC10006146.
- 616 77. Celi LA, Cellini J, Charpignon ML, Dee EC, Dernoncourt F, Eber R, et al. Sources of bias  
617 in artificial intelligence that perpetuate healthcare disparities-A global review. *PLOS Digit Health*.  
618 2022;1(3):e0000022. Epub 20220331. doi: 10.1371/journal.pdig.0000022. PubMed PMID:  
619 36812532; PubMed Central PMCID: PMC10006146.
- 620 78. Venema E, Wessler BS, Paulus JK, Salah R, Raman G, Leung LY, et al. Large-scale  
621 validation of the prediction model risk of bias assessment Tool (PROBAST) using a short form:  
622 high risk of bias models show poorer discrimination. *J Clin Epidemiol*. 2021;138:32-9. Epub  
623 20210624. doi: 10.1016/j.jclinepi.2021.06.017. PubMed PMID: 34175377.
- 624 79. Helmrich I, Mikolić A, Kent DM, Lingsma HF, Wynants L, Steyerberg EW, van Klaveren  
625 D. Does poor methodological quality of prediction modeling studies translate to poor model  
626 performance? An illustration in traumatic brain injury. *Diagn Progn Res*. 2022;6(1):8. Epub  
627 20220505. doi: 10.1186/s41512-022-00122-0. PubMed PMID: 35509061; PubMed Central  
628 PMCID: PMC10006146.
- 629  
630  
631  
632  
633

634 **SUPPORTING INFORMATION CAPTIONS**

635 **S1 Figure: PRISMA Flow diagram**

636 **S1 Table: Search Strategy in Medline**

637 **S2 Table: Search Strategy in EMBASE**

638 **S3 Table: PROBAST rating of models from individual studies**

639 **S4 Table: Responses on TRIPOD+AI and overall fidelity to transparent reporting**  
640 **standards for machine learning studies (N=30)**

641

# PROBAST Assessment of Published AI Prognostic Models in Acute Pancreatitis

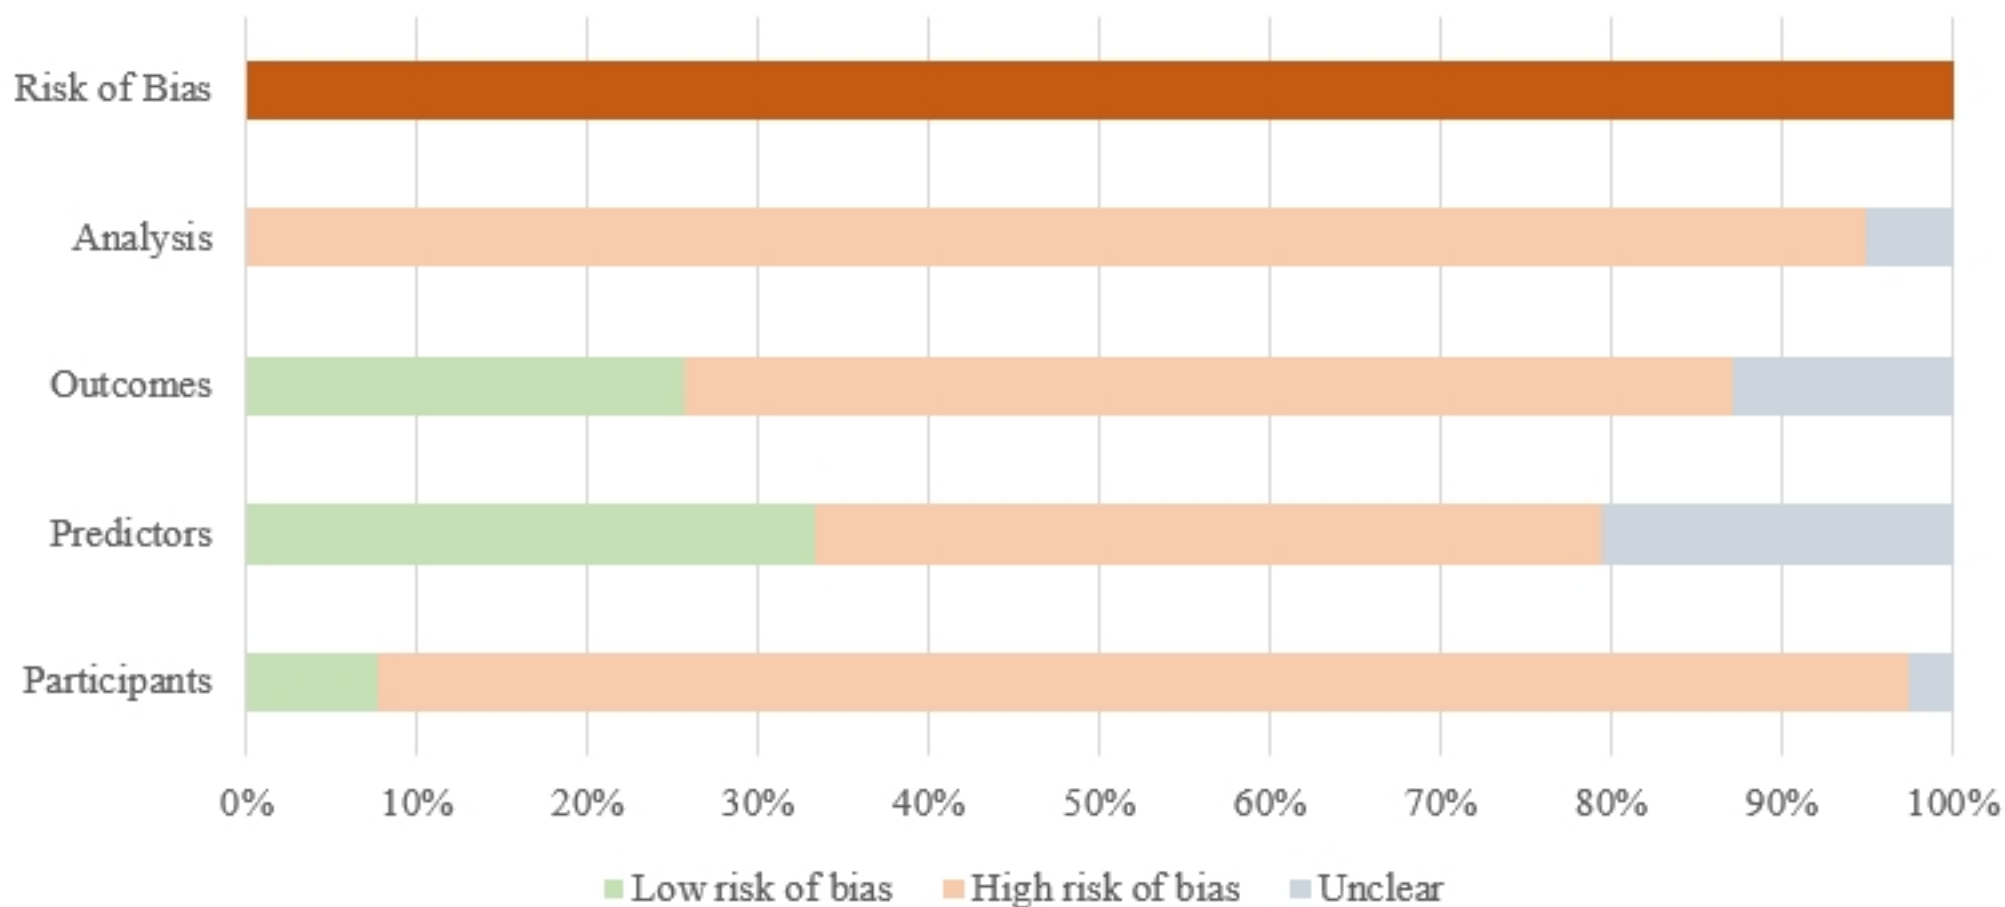



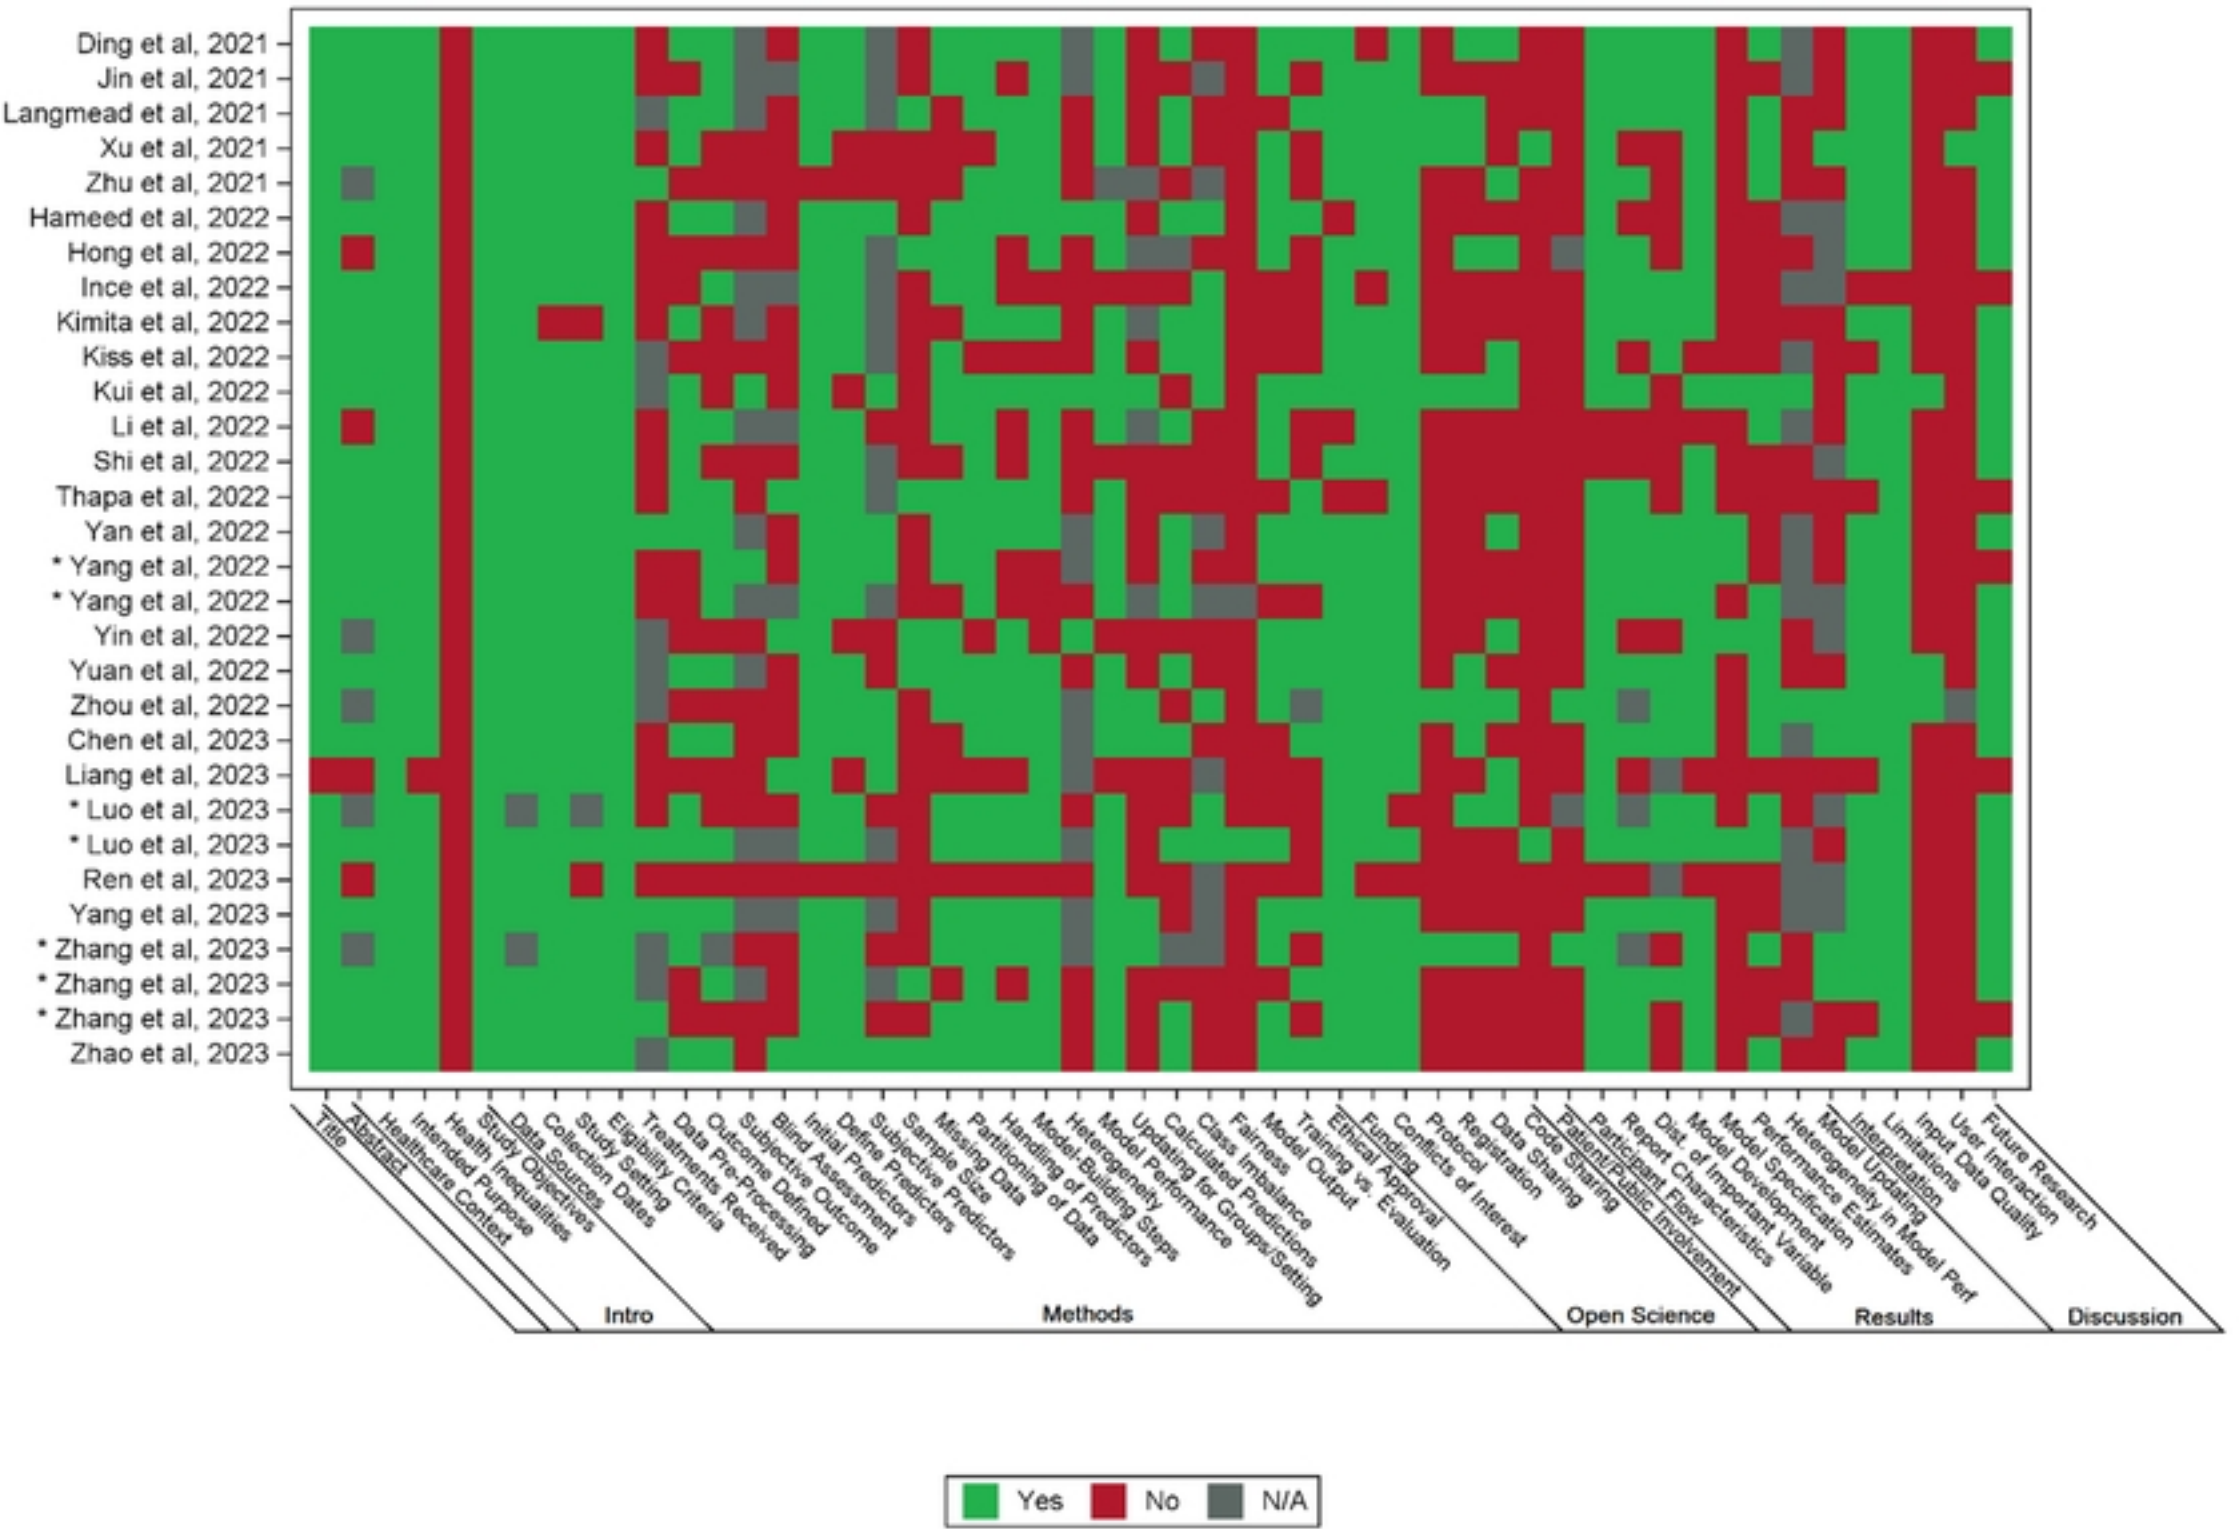

Source: https://medrxiv.org/content/medrxiv/early/2024/06/27/2024.06.26.24309389.full.pdf
